# Supplementary material for: Associations between initial American Board of Internal Medicine certification and maintenance of certification status of attending physicians and in-hospital mortality of patients with acute myocardial infarction or congestive heart failure: a retrospective cohort study of hospitalisations in Pennsylvania, USA
Source: HighWire-hosted journal article supplement (doi:10.1136/bmjopen-2021-055558), 2022-04-01
Supplement: bmjopen-2021-055558supp001_data_supplement.pdf [file bmjopen-2021-055558supp001_data_supplement.pdf]

**Supplemental Table 1. Estimated Adjusted Odds Ratios with 95% Confidence Interval (CI) for In-Hospital Mortality for Patients of All Physicians: Conditional Hospital Fixed-Effects Logistic Regression**

| <b>Parameter</b>                 | <b>Odds Ratio (95% CI)</b> | <b>p-value</b> |
|----------------------------------|----------------------------|----------------|
| <b>Patient characteristics</b>   |                            |                |
| Acute Myocardial Infarction      | 2.081 (1.957 - 2.214)      | <0.001         |
| Comorbidity Index                | 1.12 (1.092 - 1.149)       | <0.001         |
| Sex (Female)                     | 1.113 (1.05 - 1.179)       | <0.001         |
| Age                              | 1.047 (1.04 - 1.055)       | <0.001         |
| White, non-Hispanic              | 0.906 (0.495 - 1.658)      | 0.75           |
| Race/Ethnicity x Age             | 1.004 (0.996 - 1.012)      | 0.32           |
| <b>Physician characteristics</b> |                            |                |
| Ever certified                   | 0.826 (0.754 - 0.905)      | <0.001         |
| <b>Sex</b>                       |                            |                |
| Female                           | 0.969 (0.9 - 1.043)        | 0.40           |
| Missing                          | 0.619 (0.391 - 0.981)      | 0.04           |
| Age                              | 1.003 (1 - 1.006)          | <0.05          |
| USMG                             | 1.004 (0.94 - 1.072)       | 0.91           |

**Supplemental Table 2. Estimated Adjusted Odds Ratios with 95% Confidence Interval (CI) for In-Hospital Mortality for Patients of All Physicians****A. Acute Myocardial Infarction Patients**

| <b>Parameter</b>                 | <b>Odds Ratio (95% CI)</b> | <b>p-value</b> |
|----------------------------------|----------------------------|----------------|
| <b>Patient characteristics</b>   |                            |                |
| Comorbidities                    | 1.189 (1.136 - 1.245)      | <0.001         |
| Sex (Female)                     | 1.041 (0.944 - 1.148)      | 0.42           |
| Age                              | 1.046 (1.034 - 1.058)      | <0.001         |
| White, non-Hispanic              | 0.463 (0.194 - 1.109)      | 0.08           |
| Race/Ethnicity x Age             | 1.01 (0.998 - 1.022)       | 0.10           |
| <b>Physician characteristics</b> |                            |                |
| Ever certified                   | 0.827 (0.715 - 0.957)      | 0.01           |
| Sex                              |                            |                |
| Female                           | 0.889 (0.776 - 1.017)      | 0.09           |
| Missing                          | 0.711 (0.36 - 1.402)       | 0.33           |
| Age                              | 1.005 (1 - 1.01)           | 0.07           |
| USMG                             | 0.914 (0.816 - 1.023)      | 0.12           |
| <b>Facility</b>                  |                            |                |
| Volume/1000                      | 0.993 (0.977 - 1.009)      | 0.39           |
| Rural location                   | 1.177 (1.039 - 1.334)      | 0.01           |

**B. Congestive Heart Failure Patients**

| <b>Parameter</b>                 | <b>Odds Ratio (95% CI)</b> | <b>p-value</b> |
|----------------------------------|----------------------------|----------------|
| <b>Patient characteristics</b>   |                            |                |
| Comorbidities                    | 1.082 (1.049 - 1.116)      | <0.001         |
| Sex (Female)                     | 1.157 (1.078 - 1.242)      | <0.001         |
| Age                              | 1.049 (1.039 - 1.059)      | <0.001         |
| White, non-Hispanic              | 2.553 (1.132 - 5.759)      | 0.02           |
| Race/Ethnicity x Age             | 0.995 (0.985 - 1.005)      | 0.34           |
| <b>Physician characteristics</b> |                            |                |
| Ever certified                   | 0.842 (0.747 - 0.95)       | <0.01          |
| Sex                              |                            |                |
| Female                           | 0.937 (0.846 - 1.039)      | 0.22           |
| Missing                          | 0.56 (0.385 - 0.815)       | <0.01          |
| Age                              | 1.005 (1.001 - 1.009)      | 0.01           |
| USMG                             | 1.016 (0.934 - 1.106)      | 0.71           |
| <b>Facility</b>                  |                            |                |
| Volume/1000                      | 1.002 (0.989 - 1.015)      | 0.78           |
| Rural location                   | 1.263 (1.141 - 1.397)      | <0.001         |

**Supplemental Table 3. Estimated Adjusted Odds Ratios with 95% Confidence Interval (CI) for In-Hospital Mortality for Patients of Physicians Eligible for MOC: Conditional Hospital Fixed-Effects Logistic Regression**

| <b>Parameter</b>                 | <b>Odds Ratio (95% CI)</b> | <b>p-value</b> |
|----------------------------------|----------------------------|----------------|
| Acute Myocardial Infarction      | 2.124 (1.897 - 2.377)      | <0.001         |
| Comorbidity Index                | 1.161 (1.108 - 1.216)      | <0.001         |
| Sex (Female)                     | 1.073 (0.966 - 1.193)      | 0.19           |
| Age                              | 1.056 (1.041 - 1.071)      | <0.001         |
| White, non-Hispanic              | 2.299 (0.686 - 7.702)      | 0.18           |
| Race/Ethnicity x Age             | 0.991 (0.976 - 1.006)      | 0.24           |
| <b>Physician characteristics</b> |                            |                |
| MOC                              | 0.794 (0.695 - 0.908)      | <0.01          |
| Sex                              |                            |                |
| Female                           | 1.006 (0.867 - 1.167)      | 0.94           |
| Missing                          | 0.833 (0.324 - 2.142)      | 0.71           |
| Age                              | 0.996 (0.986 - 1.006)      | 0.41           |
| USMG                             | 1.076 (0.941 - 1.23)       | 0.29           |

**Supplemental Table 4. Estimated Adjusted Odds Ratios with 95% Confidence Interval (CI) for In-Hospital Mortality for Patients of Physicians Eligible for MOC****A. Acute Myocardial Infarction Patients**

| Parameter                        | Odds Ratio (95% CI)    | p-value |
|----------------------------------|------------------------|---------|
| <b>Patient characteristics</b>   |                        |         |
| Comorbidities                    | 1.168 (1.077 - 1.266)  | <0.001  |
| Sex (Female)                     | 1.011 (0.842 - 1.214)  | 0.91    |
| Age                              | 1.062 (1.037 - 1.088)  | <0.001  |
| White, non-Hispanic              | 2.677 (0.385 - 18.634) | 0.32    |
| Race/Ethnicity x Age             | 0.987 (0.963 - 1.013)  | 0.33    |
| <b>Physician characteristics</b> |                        |         |
| MOC                              | 0.853 (0.678 - 1.074)  | 0.18    |
| Sex                              |                        |         |
| Female                           | 0.86 (0.662 - 1.117)   | 0.26    |
| Missing                          | 0.406 (0.139 - 1.186)  | 0.10    |
| Age                              | 1.004 (0.986 - 1.022)  | 0.68    |
| USMG                             | 0.896 (0.718 - 1.117)  | 0.33    |
| <b>Facility</b>                  |                        |         |
| Volume/1000                      | 0.989 (0.959 - 1.019)  | 0.47    |
| Rural location                   | 1.193 (0.931 - 1.529)  | 0.16    |

**B. Congestive Heart Failure Patients**

| Parameter                        | Odds Ratio (95% CI)    | p-value |
|----------------------------------|------------------------|---------|
| <b>Patient characteristics</b>   |                        |         |
| Comorbidities                    | 1.149 (1.088 - 1.213)  | <0.001  |
| Sex (Female)                     | 1.103 (0.964 - 1.263)  | 0.15    |
| Age                              | 1.051 (1.035 - 1.067)  | <0.001  |
| White, non-Hispanic              | 3.217 (0.872 - 11.861) | 0.08    |
| Race/Ethnicity x Age             | 0.99 (0.973 - 1.006)   | 0.23    |
| <b>Physician characteristics</b> |                        |         |
| MOC                              | 0.777 (0.66 - 0.915)   | <0.01   |
| Sex                              |                        |         |
| Female                           | 0.94 (0.768 - 1.15)    | 0.55    |
| Missing                          | 0.906 (0.29 - 2.826)   | 0.87    |
| Age                              | 0.995 (0.982 - 1.009)  | 0.50    |
| USMG                             | 1.029 (0.879 - 1.205)  | 0.72    |
| <b>Facility</b>                  |                        |         |
| Volume/1000                      | 1.005 (0.983 - 1.028)  | 0.63    |
| Rural location                   | 1.27 (1.059 - 1.523)   | 0.01    |
